# Supplementary material
Source: PubMed Central journal article supplement (PMC4010173)
Supplement: Supp_Table1.pdf [file Supp_Table1.pdf]

## Supplementary Data

SUPPLEMENTARY TABLE S1. ANTIBODIES USED TO EVALUATE EIGHT DIFFERENT IMMUNOLOGICAL FUNCTIONS (CATEGORIES) OF T CELLS

| <i>Antibody</i> | <i>Fluorochrome(s)</i> | <i>Clone</i> | <i>Company</i>  |
|-----------------|------------------------|--------------|-----------------|
| CD3             | ECD                    | UCHT1        | Beckman Coulter |
| CD4             | FITC                   | MEM-241      | Immunotools     |
| CD4             | PECy7                  | SFC112T4D11  | Beckman Coulter |
| CD8             | ECD / PECy7            | SFC121Thy2D3 | Beckman Coulter |
| CD8             | PE/Dy647               | MEM-31       | Immunotools     |
| CD45RA          | ECD                    | 2H4          | Beckman Coulter |
| CD27            | PE                     | M-T271       | BD Pharmingen   |
| CD38            | PECy5                  | LS198-4-3    | Beckman Coulter |
| HLA-DR          | FITC                   | Immu-357     | Beckman Coulter |
| CD31            | FITC                   | WM59         | BD Pharmingen   |
| CD127           | FITC                   | MB15-18C9    | Miltenyi Biotec |
| CD127           | PE                     | R34.34       | Beckman Coulter |
| CD57            | FITC                   | TB03         | Miltenyi Biotec |
| PD-1            | Biotin/StrepPECy7      | eBioJ105     | eBioscience     |
| Tim-3           | PE                     | 344823       | R&D Systems     |
| CD25            | PECy5                  | M-A251       | BD Pharmingen   |
| FoxP3           | FITC                   | PCH101       | eBioscience     |
